# Supplementary material
Source: MDPI journal article supplement (https://www.mdpi.com/search?q=toxins-11-00467)
Supplement: s001 [file toxins-11-00467-s001.pdf]

## Supplementary Materials: Genetic Profiling of *Aspergillus* Isolates with Varying Aflatoxin Production Potential from Different Maize Growing Regions of Kenya

Richard Dooso Oloo, Sheila Okoth, Peter Wachira, Samuel Mutiga, Phillis Ochieng, Leah Kago, Fredrick Nganga, Jean-Baka Domelevo Entfellner and Sita Ghimire

**Table S1.** Clusters of *Aspergillus flavus* isolates based on ITS sequences showing all the isolates in each cluster.

| Cluster | Isolate Code                                                                                                                                                                                                                                                                                                                                                                                                                                                                                                                                                                                                                                                                                                                                                                                                                                                                                                                                                       | Total Isolates | NCBI Identity    |
|---------|--------------------------------------------------------------------------------------------------------------------------------------------------------------------------------------------------------------------------------------------------------------------------------------------------------------------------------------------------------------------------------------------------------------------------------------------------------------------------------------------------------------------------------------------------------------------------------------------------------------------------------------------------------------------------------------------------------------------------------------------------------------------------------------------------------------------------------------------------------------------------------------------------------------------------------------------------------------------|----------------|------------------|
| 1       | 26                                                                                                                                                                                                                                                                                                                                                                                                                                                                                                                                                                                                                                                                                                                                                                                                                                                                                                                                                                 | 1              | <i>A. flavus</i> |
| 4       | 42                                                                                                                                                                                                                                                                                                                                                                                                                                                                                                                                                                                                                                                                                                                                                                                                                                                                                                                                                                 | 1              | <i>A. flavus</i> |
| 2       | 167                                                                                                                                                                                                                                                                                                                                                                                                                                                                                                                                                                                                                                                                                                                                                                                                                                                                                                                                                                | 1              | <i>A. flavus</i> |
| 3       | 199                                                                                                                                                                                                                                                                                                                                                                                                                                                                                                                                                                                                                                                                                                                                                                                                                                                                                                                                                                | 1              | <i>A. flavus</i> |
| 5       | 16, 160, 181, 21, 216, 219, 22, 224, 225, 25, 36, 39, 52, 64                                                                                                                                                                                                                                                                                                                                                                                                                                                                                                                                                                                                                                                                                                                                                                                                                                                                                                       | 14             | <i>A. flavus</i> |
| 6       | 161                                                                                                                                                                                                                                                                                                                                                                                                                                                                                                                                                                                                                                                                                                                                                                                                                                                                                                                                                                | 1              | <i>A. flavus</i> |
| 7       | 104, 105, 106, 118, 120, 4, 5, 60, 62, 63, 72<br>1, 10, 100, 101, 102, 103, 107, 108, 109, 11, 110, 111, 112, 113, 114,<br>115, 116, 117, 119, 12, 121, 122, 123, 124, 125, 126, 127, 128, 129,<br>13, 130, 131, 132, 133, 134, 137, 138, 139, 14, 140, 141, 142, 145,<br>146, 147, 148, 149, 15, 150, 151, 152, 153, 154, 155, 156, 157, 158,<br>159, 162, 163, 164, 165, 168, 17, 170, 171, 172, 173, 174, 179, 18,<br>182, 183, 184, 185, 186, 187, 188, 189, 19, 190, 191, 192, 193, 194,<br>195, 196, 197, 198, 2, 20, 200, 201, 202, 203, 204, 205, 207, 208,<br>209, 210, 211, 212, 213, 214, 215, 217, 218, 220, 221, 222, 223, 226,<br>227, 228, 229, 23, 230, 231, 232, 233, 234, 235, 24, 28, 29, 3, 30, 31,<br>32, 33, 34, 35, 37, 38, 40, 41, 43, 44, 45, 46, 47, 48, 49, 50, 51, 53,<br>54, 55, 56, 57, 58, 59, 6, 61, 65, 66, 67, 68, 69, 7, 70, 71, 73, 74, 75,<br>76, 77, 78, 79, 8, 85, 86, 87, 88, 89, 9, 90, 91, 92, 93, 95, 96, 97, 98,<br>99 | 11             | <i>A. flavus</i> |
| 8       | 195, 196, 197, 198, 2, 20, 200, 201, 202, 203, 204, 205, 207, 208,<br>209, 210, 211, 212, 213, 214, 215, 217, 218, 220, 221, 222, 223, 226,<br>227, 228, 229, 23, 230, 231, 232, 233, 234, 235, 24, 28, 29, 3, 30, 31,<br>32, 33, 34, 35, 37, 38, 40, 41, 43, 44, 45, 46, 47, 48, 49, 50, 51, 53,<br>54, 55, 56, 57, 58, 59, 6, 61, 65, 66, 67, 68, 69, 7, 70, 71, 73, 74, 75,<br>76, 77, 78, 79, 8, 85, 86, 87, 88, 89, 9, 90, 91, 92, 93, 95, 96, 97, 98,<br>99                                                                                                                                                                                                                                                                                                                                                                                                                                                                                                  | 186            | <i>A. flavus</i> |
| 9       | 206                                                                                                                                                                                                                                                                                                                                                                                                                                                                                                                                                                                                                                                                                                                                                                                                                                                                                                                                                                | 1              | <i>A. flavus</i> |
| 10      | 135                                                                                                                                                                                                                                                                                                                                                                                                                                                                                                                                                                                                                                                                                                                                                                                                                                                                                                                                                                | 1              | <i>A. flavus</i> |

**Table S2.** Clusters of *Aspergillus flavus* isolates with the positions showing nucleotide substitutions, deletions and insertions on ITS gene region

| Isolate Cluster Group | Position and type of SNP observed                            | Total No. of SNPs |
|-----------------------|--------------------------------------------------------------|-------------------|
| Cluster 1             | 77: Substitution of C with A                                 | 1                 |
| Cluster 2             | 77: Substitution of C with A<br>87: Substitution of G with C | 2                 |
| Cluster 3             | 38: Substitution of A with C<br>48: Insertion of A           | 2                 |
| Cluster 4             | 490: Substitution of C with A                                | 1                 |
| Cluster 6             | 63: Substitution of C with T                                 | 2                 |

|            |                                                                                                                                                          |    |
|------------|----------------------------------------------------------------------------------------------------------------------------------------------------------|----|
| Cluster 7  | 466: Substitution of T with C<br>29: Substitution of C with T<br>399: Substitution of T with C                                                           | 2  |
| Cluster 8  | 466: Substitution of T with C                                                                                                                            | 1  |
| Cluster 9  | 122, 164, 175, 391, 406, 450 and 587: Substitution of G with A<br>133: Substitution of G with C                                                          | 8  |
| Cluster 10 | 164, 172, 175, 266, 274, 344, 346, 376, 391, 401, 406, 410, 483,<br>and 587: Substitution of G with A<br>189, 333, 452 and 486: Substitution of G with C | 18 |

**Table S3.** *Aspergillus flavus* isolates with positions showing nucleotide substitutions, deletions and insertions on Calmodulin gene region

| NCBI identity               | Isolates                                                                                                                                  | Nucleotide Position and Polymorphism Type                                                                                                                                                                                                       | Total No. of SNPs |
|-----------------------------|-------------------------------------------------------------------------------------------------------------------------------------------|-------------------------------------------------------------------------------------------------------------------------------------------------------------------------------------------------------------------------------------------------|-------------------|
| <i>A. flavus</i>            | 8, 76, 74                                                                                                                                 | 105, 256 and 532: Substitution of G with A<br>144: Substitution of A with G                                                                                                                                                                     | 4                 |
| <i>A. flavus</i>            | 73, 4, 44, 52, 6, 60, 62,<br>72, 225, 223, 22, 218,<br>216, 206, 199, 185, 179,<br>161, 160, 156, 152,<br>147, 137, 128, 120, 102,<br>104 | 222 and 533: Substitution of G with A<br>543: Substitution of A with T<br>557: Insertion of A                                                                                                                                                   | 4                 |
| <i>A. flavus</i>            | 181, 107                                                                                                                                  | 16: Substitution of C with G<br>447: Substitution of G with A<br>30, 33, 222 and 530: Substitution of G with A<br>34: Insertion of G                                                                                                            | 2                 |
| <i>A. flavus</i>            | 165, 157                                                                                                                                  | 35: Substitution of C with T<br>541: Substitution of A with T<br>557: Insertion of A                                                                                                                                                            | 8                 |
| <i>A. flavus</i>            | 42, 141, 167, 207, 36, 39                                                                                                                 | 16: Substitution of C with G<br>222 and 531: Substitution of G with A<br>542: Substitution of A with T<br>557: Insertion of A                                                                                                                   | 1                 |
| <i>A. flavus</i>            | 135                                                                                                                                       | 576: Substitution of A with C<br>508: Substitution of T with A<br>607: Insertion of A                                                                                                                                                           | 5                 |
| <i>A. flavus</i>            | 56                                                                                                                                        | 2: Substitution of A with C<br>39, 255, 303: Substitution of G with A<br>144 and 424: Substitution of A with G<br>701: Substitution of T with A<br>672: Substitution of T with C<br>15: Substitution of C with T<br>2: Substitution of A with C | 2                 |
| <i>A. minisclerotigenes</i> | 145                                                                                                                                       | 39, 205 and 303: Substitution of G with A<br>144 and 424: Substitution of A with G<br>701: Substitution of T with A                                                                                                                             | 9                 |
| <i>A. minisclerotigenes</i> | 25                                                                                                                                        | 39 and 255: Substitution of G with A<br>144 and 424: Substitution of A with G<br>701: Substitution of T with A                                                                                                                                  | 7                 |
| <i>A. minisclerotigenes</i> | 231                                                                                                                                       | 39 and 255: Substitution of G with A<br>144 and 424: Substitution of A with G                                                                                                                                                                   | 11                |

|                             |                |                                                                                                                                                                                                   |   |
|-----------------------------|----------------|---------------------------------------------------------------------------------------------------------------------------------------------------------------------------------------------------|---|
| <i>A. minisclerotigenes</i> |                | 701: Substitution of T with A<br>203 and 218: Substitution of C with T<br>243 and 466: Substitution of C with G<br>344 and 437: Substitution of G with T<br>144 and 424: Substitution of A with G |   |
| <i>A. minisclerotigenes</i> | 138, 64        | 255: Substitution of G with A<br>701: Substitution of T with A<br>466: Substitution of C with G                                                                                                   | 5 |
| <i>A. minisclerotigenes</i> | 88, 86, 85, 78 | 144 and 424: Substitution of A with G<br>255 and 691: Substitution of G with A<br>701: Substitution of T with A<br>466: Substitution of C with G                                                  | 6 |

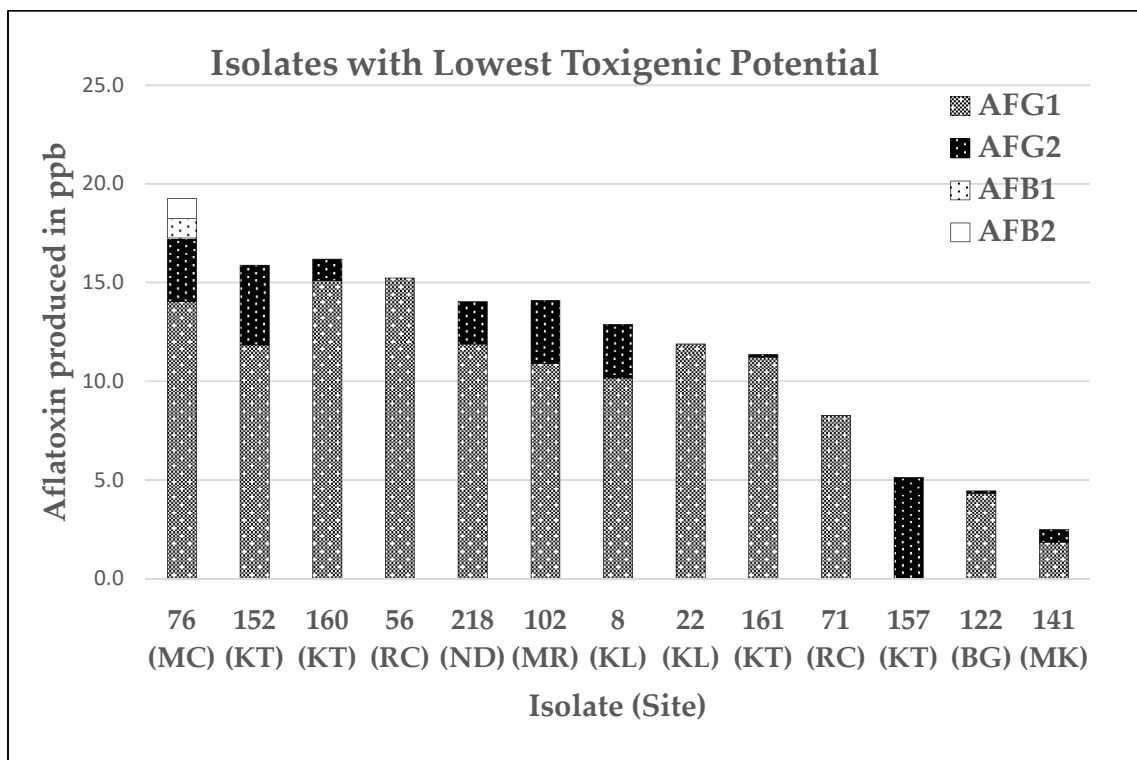

**Figure S1.** Aflatoxin types produced by low aflatoxigenic *Aspergillus flavus* isolates. RC=Rachuonyo, BG=Bungoma, KT=Kitale, ND=Nandi, MC Machakos, MK=Makueni, MR=Meru) and KL=Kilifi.

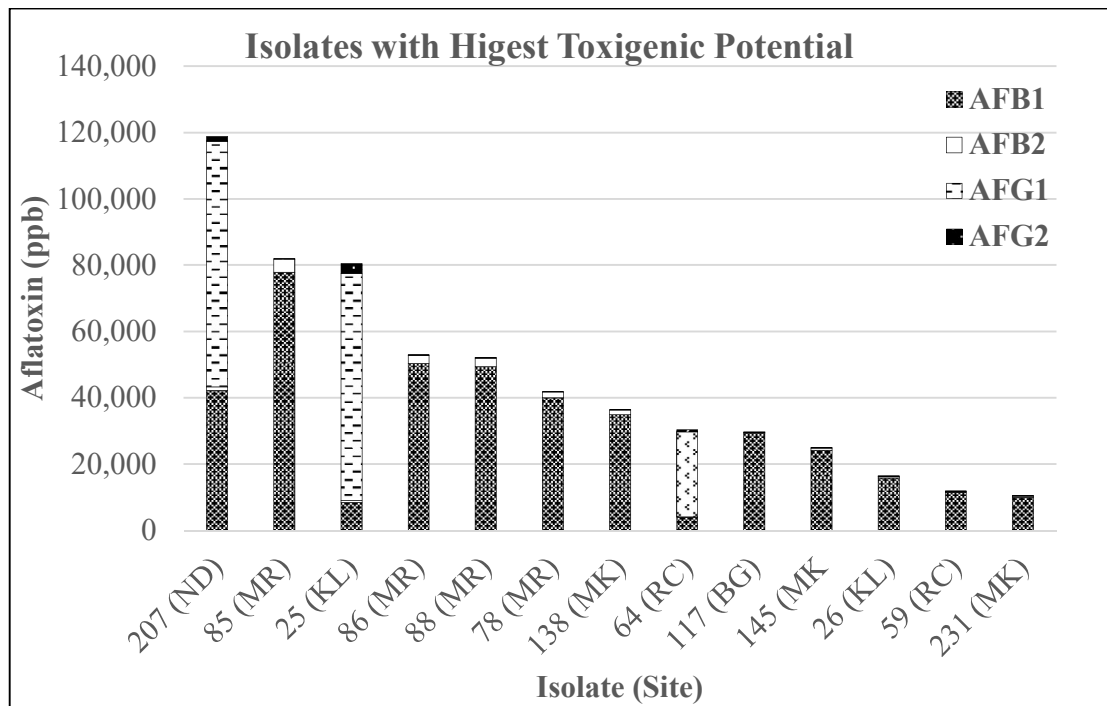

**Figure S2.** Aflatoxin types produced by high aflatoxigenic *Aspergillus spp.* isolates. RC=Rachuonyo, BG=Bungoma, KT=Kitale, ND=Nandi, MC Machakos, MK=Makueni, MR=Meru) and KL=Kilifi.

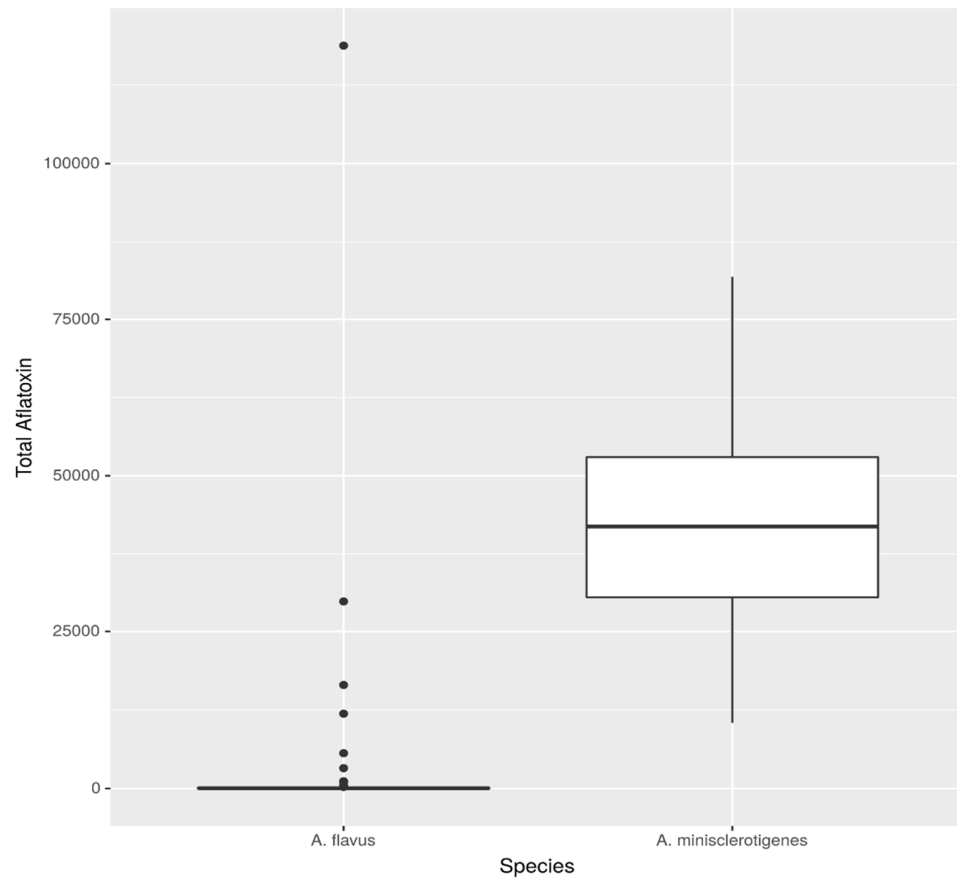

**Figure S3.** A boxplot showing the comparison of the total Aflatoxin production potential between *Aspergillus flavus* and *Aspergillus minisclerotigenes*

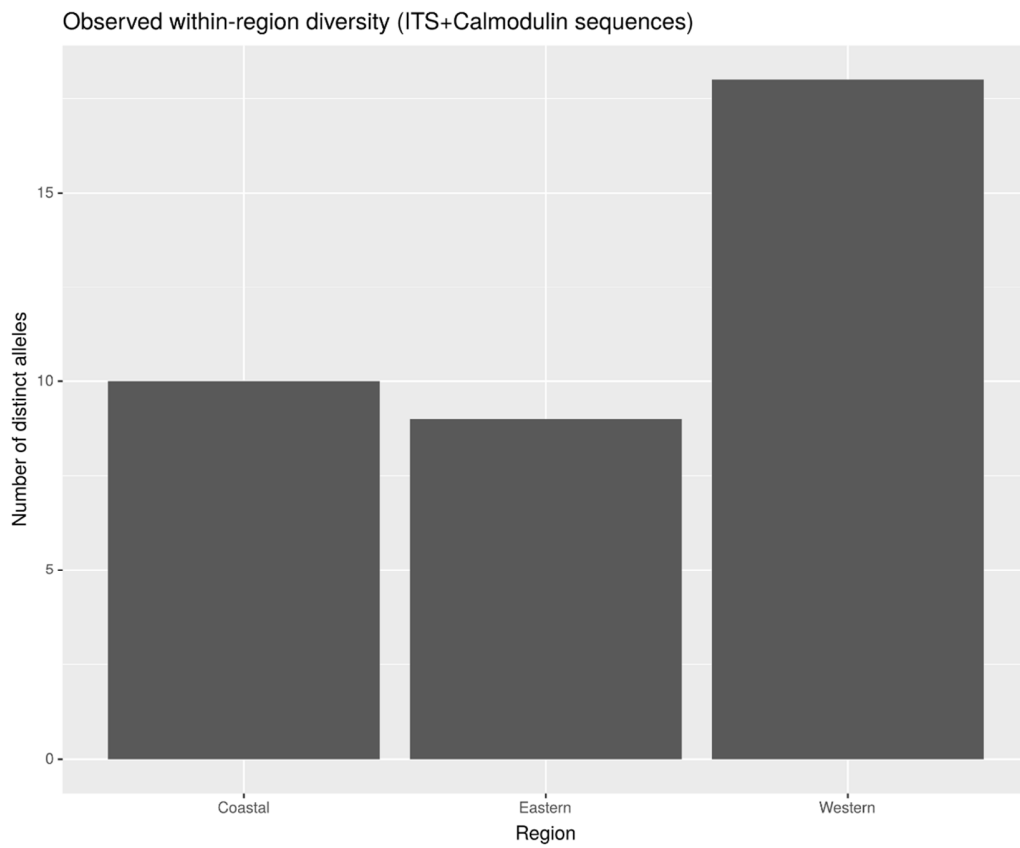

**Figure S4.** A graph of distinct alleles of *Aspergillus flavus* isolates observed in each of three region.

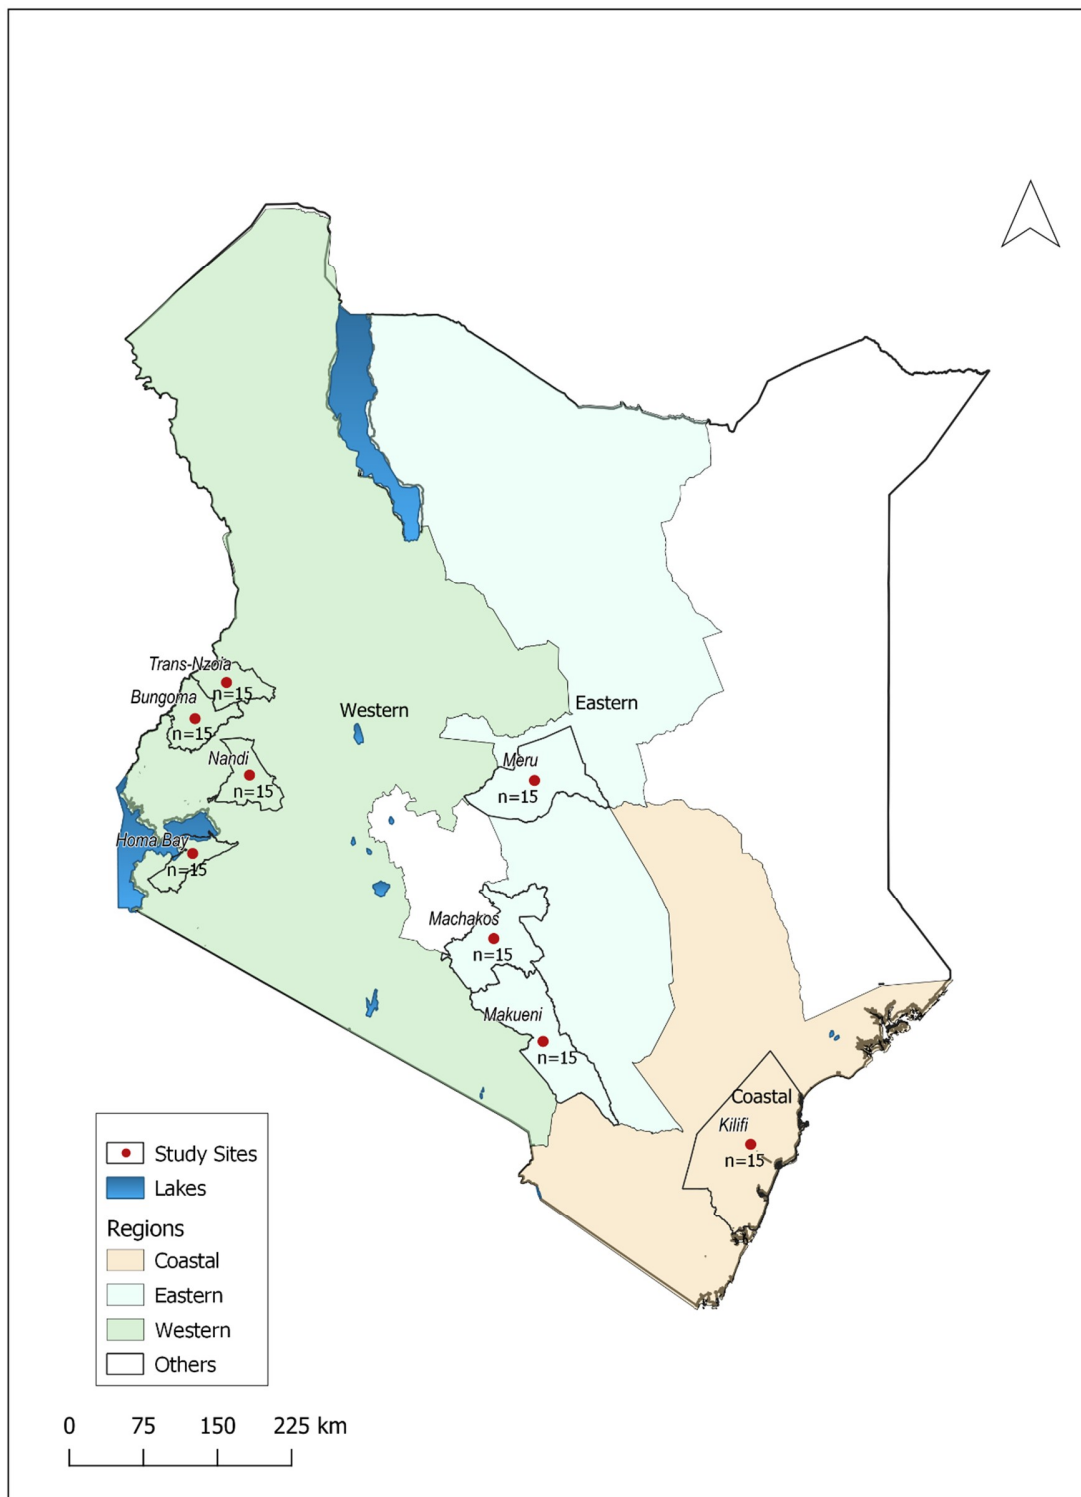

Figure S5. Map of Kenya showing the sampling sites (red dots) within the three geographical regions.
